# Supplementary material
Source: MDPI journal article supplement (https://www.mdpi.com/2073-8994/15/3/752)
Supplement: s1 [file s1]

# Electrochemistry of rhodanine derivatives as model for new colorimetric and electrochemical azulene sensors for the detection of heavy metal ions

Ovidiu-Teodor Matica, Cornelia Musina (Borsaru), Alina Giorgiana Brotea, Eleonora-Mihaela Ungureanu, Mihaela Cristea, George-Octavian Buica and Alexandru C. Razus

**Basic properties for the ligand R1 and characterization by elemental analysis, UV-Vis, <sup>1</sup>H NMR, <sup>13</sup>C-NMR, IR, MS**

**(Z)-5-(Azulen-1-ylmethylene)-2-thioxo-thiazolidin-4-one (R1)**, Dark brown crystals, it decomposes without melting. UV-Vis (MeOH),  $\lambda$  (log  $\epsilon$ ): 228 (4.07), 236 (4.07), 258 (4.07), 276 (4.05), 293 (3.95), 296 (3.95), 338 (3.82), 468 (4.47), 569 (3.09), 656 (2.80), 709 (2.55), 769 (2.56), 782 (2.57) nm. <sup>1</sup>H-NMR (300 MHz, DMSO, 25 °C): 7.53 [1 H, t, 3JH,H = 9.8, C(5')-H], 7.60 [1 H, t, 3JH,H = 9.8, C(7')-H], 7.64 [1 H, d, 3JH,H = 4.2, C(3')-H], 7.96 [1 H, t, 3JH,H = 9.8, C(6')-H], 7.99 [1 H, d, 3JH,H = 4.2, C(2')-H], 8.20 (1 H, s, CH=), 8.60 [1 H, d, 3JH,H = 9.4, C(4')-H], 8.94 [1 H, d, 3JH,H = 9.9, C(8')-H], 13.59 [1 H, s, NH] ppm; <sup>13</sup>C-NMR (75 MHz, DMSO, 25 °C): 119.1 (C-5), 122.0 (C-1'), 122.0 (C-3'), 123.7 (C-2'), 127.5 (C-7'), 128.2 (C-5'), 135.6 (CH=), 135.8 (C-8'), 139.2 (C-4'), 140.9 (C-6'), 140.9 (C-8a'), 144.1 (C-3a'), 169.4 (C-4), 194.8 (C-2) ppm. IR (neat): 490, 594, 655, 735, 775, 885, 957, 1092, 1176, 1232, 1284, 1333, 1371, 1397, 1483, 1613, 1706M, 2851, 2923, 3131 cm<sup>-1</sup>. MS [ESI]: 272 [M+1]. Calcd. for C<sub>14</sub>H<sub>9</sub>NOS<sub>2</sub>: C, 61.97; H, 3.34; N, 5.16; S. Found: C, 61.96; H, 3.37; N, 5.17.

**Table S1.** Equations of CV peak currents linear dependences on concentration for **R2**; the cathodic currents are in absolute values.

| Process <sup>1</sup> | Equation                                                    | Adj. R-Square    |
|----------------------|-------------------------------------------------------------|------------------|
| a1                   | $ipa1 = 2.15 \times 10^{-5} + 1.91 \times 10^{-5} \times c$ | 0.996            |
| a2                   | $ipa2 = 1.49 \times 10^{-6} + 2.58 \times 10^{-5} \times c$ | 0.998            |
| a5                   | $ipa5 = 1.18 \times 10^{-4} + 8.67 \times 10^{-5} \times c$ | 0.935            |
| c1                   | $ipc1 = 1.82 \times 10^{-5} + 6.35 \times 10^{-6} \times c$ | 0.577            |
| c3                   | nlc <sup>2</sup>                                            | nlc <sup>2</sup> |

<sup>1</sup>a3, a4 and c2 process have shoulders, and the peak value can't be evaluated.<sup>2</sup> nonlinear correlation

**Table S2.** Equations of DPV peak currents linear dependences on concentration for **R2**; the cathodic currents are in absolute values.

| Process <sup>1</sup> | Equation                                                     | Adj. R-Square |
|----------------------|--------------------------------------------------------------|---------------|
| a1                   | $ipa1 = 9.1 \times 10^{-7} + 8.54 \times 10^{-6} \times c$   | 0.999         |
| a2                   | $ipa2 = -2.29 \times 10^{-8} + 8.16 \times 10^{-6} \times c$ | 0.999         |
| a4                   | $ipa4 = 3.83 \times 10^{-6} + 4.87 \times 10^{-6} \times c$  | 0.968         |
| a5                   | $ipa5 = 6.18 \times 10^{-6} + 1.01 \times 10^{-6} \times c$  | 0.998         |
| c1                   | $ipc1 = 2.95 \times 10^{-7} + 5.61 \times 10^{-6} \times c$  | 1.000         |
| c3                   | $ipc3 = 5.05 \times 10^{-6} + 1.69 \times 10^{-5} \times c$  | 0.983         |

<sup>1</sup>a3 and c2 process have shoulders, and the peak value can't be evaluated.

**Table S3.** Calculated r/m ratios for (Pb)<sub>m</sub>(R1)<sub>r</sub> from absorbance (A) values according to Mollard method.

| Crit.<br>No. | Excess of Pb |             |       | Excess of Ligand |             |        | r/m   | m | r    | Complex<br>formula |
|--------------|--------------|-------------|-------|------------------|-------------|--------|-------|---|------|--------------------|
|              | [Pb]/[R1]    | [R1],<br>μM | A     | [Pb]/[<br>R1]    | [Pb],<br>μM | A      |       |   |      |                    |
| 1            | 5/1          | 12.069      | 0.341 | 0.4/1            | 5.230       | 0.346  | 2.041 | 1 | 2.04 | PbR1 <sub>2</sub>  |
| 2            | 4.5/1        | 12.143      | 0.388 | 0.4/1            | 5.230       | 0.346  | 2.107 | 1 | 2.11 | PbR1 <sub>2</sub>  |
| 3            | 4/1          | 12.217      | 0.376 | 0.4/1            | 5.230       | 0.346  | 2.190 | 1 | 2.19 | PbR1 <sub>2</sub>  |
| 4            | 3.5/1        | 12.292      | 0.369 | 0.4/1            | 5.230       | 0.346  | 2.244 | 1 | 2.24 | PbR1 <sub>2</sub>  |
| 5            | 3.5/1        | 12.292      | 0.369 | 0.5/1            | 6.529       | 0.339  | 1.730 | 1 | 1.73 | PbR1 <sub>2</sub>  |
| 6            | 3/1          | 12.368      | 0.348 | 0.5/1            | 6.529       | 0.339  | 1.847 | 1 | 1.85 | PbR1 <sub>2</sub>  |
| 7            | 2.5/1        | 12.445      | 0.355 | 0.5/1            | 6.529       | 0.339  | 1.820 | 1 | 1.82 | PbR1 <sub>2</sub>  |
| 8            | 5/1          | 12.069      | 0.341 | 0.7/1            | 9.117       | 0.330  | 1.096 | 1 | 1.10 | PbR1               |
| 9            | 5/1          | 0.398       | 0.341 | 0.8/1            | 5.230       | 10.406 | 0.944 | 1 | 0.94 | PbR1               |
| 10           | 4.5/1        | 12.143      | 0.388 | 0.8/1            | 5.230       | 10.406 | 0.974 | 1 | 0.97 | PbR1               |
| 11           | 4/1          | 12.217      | 0.376 | 0.8/1            | 5.230       | 10.406 | 1.013 | 1 | 1.01 | PbR1               |
| 12           | 3.5/1        | 12.292      | 0.369 | 0.8/1            | 5.230       | 10.406 | 1.038 | 1 | 1.04 | PbR1               |
| 13           | 3.5/1        | 12.292      | 0.369 | 0.9/1            | 11.692      | 0.320  | 0.912 | 1 | 0.91 | PbR1               |
| 14           | 3/1          | 12.368      | 0.348 | 0.9/1            | 11.692      | 0.320  | 0.974 | 1 | 0.97 | PbR1               |
| 15           | 2.5/1        | 12.445      | 0.355 | 0.9/1            | 11.692      | 0.320  | 0.960 | 1 | 0.96 | PbR1               |

**Table S4.** Calculated r/m ratios for (Pb)<sub>m</sub>(R2)<sub>r</sub> from absorbance (A) values according to Mollard method.

| Crit.<br>No. | Excess of Pb |             |       | Excess of Ligand |             |       | r/m   | m | r    | Complex<br>formula |
|--------------|--------------|-------------|-------|------------------|-------------|-------|-------|---|------|--------------------|
|              | [Pb]/[R2]    | [R2],<br>μM | A     | [Pb]/[<br>R2]    | [Pb],<br>μM | A     |       |   |      |                    |
| 1            | 3/1          | 5.438       | 0.235 | 0.5/1            | 2.756       | 0.276 | 2.316 | 1 | 2.32 | PbR2 <sub>2</sub>  |
| 2            | 3/1          | 5.438       | 0.235 | 0.6/1            | 3.306       | 0.263 | 1.840 | 1 | 1.84 | PbR2 <sub>2</sub>  |
| 3            | 2.5/1        | 5.453       | 0.232 | 0.5/1            | 2.756       | 0.276 | 2.352 | 1 | 2.35 | PbR2 <sub>2</sub>  |
| 4            | 2.5/1        | 5.453       | 0.232 | 0.6/1            | 3.306       | 0.263 | 1.869 | 1 | 1.87 | PbR2 <sub>2</sub>  |
| 5            | 2/1          | 5.468       | 0.231 | 0.5/1            | 2.756       | 0.276 | 2.369 | 1 | 2.37 | PbR2 <sub>2</sub>  |
| 6            | 2/1          | 5.468       | 0.231 | 0.6/1            | 3.306       | 0.263 | 1.883 | 1 | 1.88 | PbR2 <sub>2</sub>  |
| 7            | 1.8/1        | 5.474       | 0.229 | 0.5/1            | 2.756       | 0.276 | 2.394 | 1 | 2.39 | PbR2 <sub>2</sub>  |
| 8            | 1.8/1        | 5.474       | 0.229 | 0.6/1            | 3.306       | 0.276 | 1.903 | 1 | 1.90 | PbR2 <sub>2</sub>  |
| 9            | 1.5/1        | 5.483       | 0.231 | 0.5/1            | 2.756       | 0.263 | 2.378 | 1 | 2.38 | PbR2 <sub>2</sub>  |
| 10           | 1.5/1        | 5.483       | 0.231 | 0.6/1            | 3.306       | 0.276 | 1.890 | 1 | 1.89 | PbR2 <sub>2</sub>  |
| 11           | 3/1          | 5.438       | 0.235 | 1/1              | 5.498       | 0.236 | 0.995 | 1 | 0.99 | PbR2               |
| 12           | 2.5/1        | 5.453       | 0.232 | 1/1              | 5.498       | 0.236 | 1.011 | 1 | 1.01 | PbR2               |
| 13           | 2/1          | 5.468       | 0.231 | 1/1              | 5.498       | 0.236 | 1.018 | 1 | 1.02 | PbR2               |
| 14           | 1.8/1        | 5.474       | 0.229 | 1/1              | 5.498       | 0.236 | 1.029 | 1 | 1.03 | PbR2               |
| 15           | 1.5/1        | 5.483       | 0.231 | 1/1              | 5.498       | 0.236 | 1.022 | 1 | 1.02 | PbR2               |

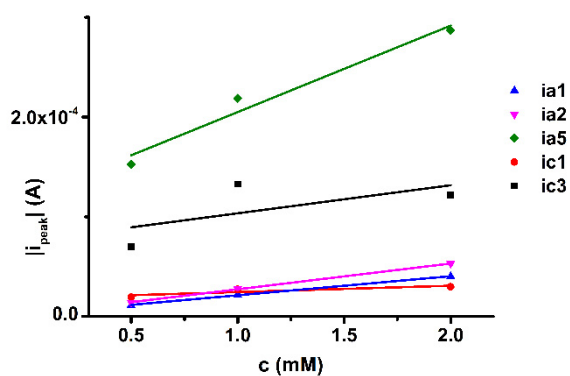

**Figure S1.** Dependences of the CV peak currents (at the scan rate of  $0.1 \text{ Vs}^{-1}$ ) vs. **R2** concentration ( $c$ ); the cathodic currents are in absolute value.

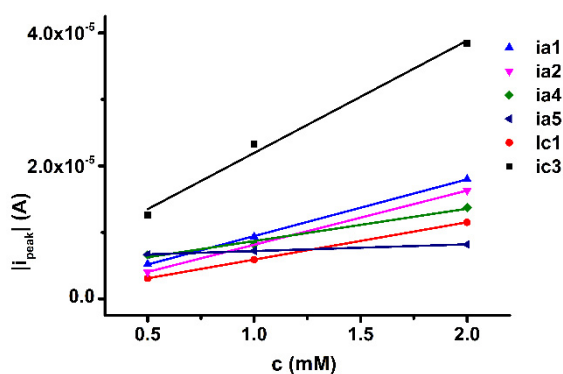

**Figure S2.** Dependences of peak currents for DPV vs. **R2** concentration ( $c$ ); the cathodic currents are in absolute value.

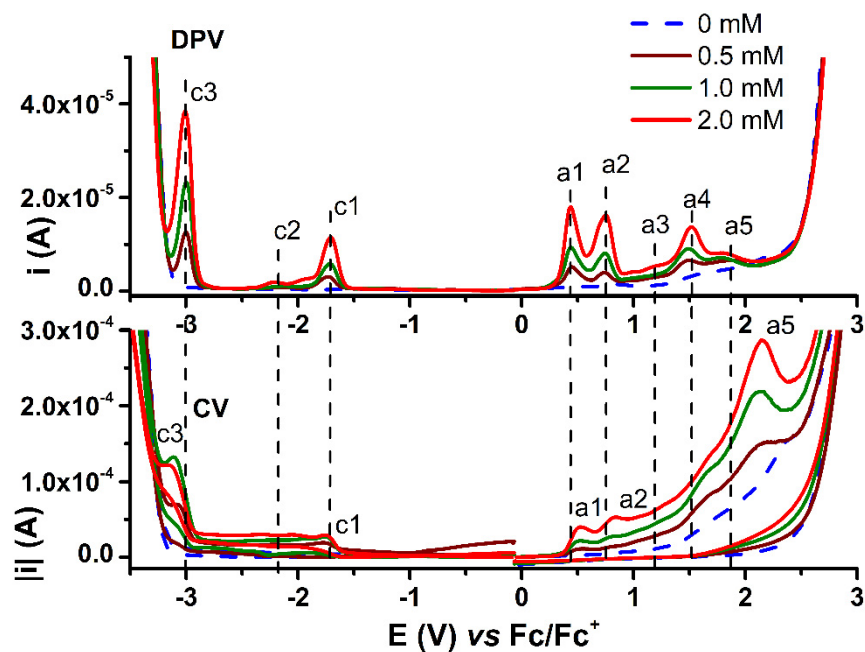

**Figure S3.** DPV and CV ( $0.1 \text{ V/s}$ ) curves on GC for **R2** at different concentrations (mM) in  $0.1 \text{ M TBAP/CH}_3\text{CN}$ ; the cathodic currents are in absolute value.

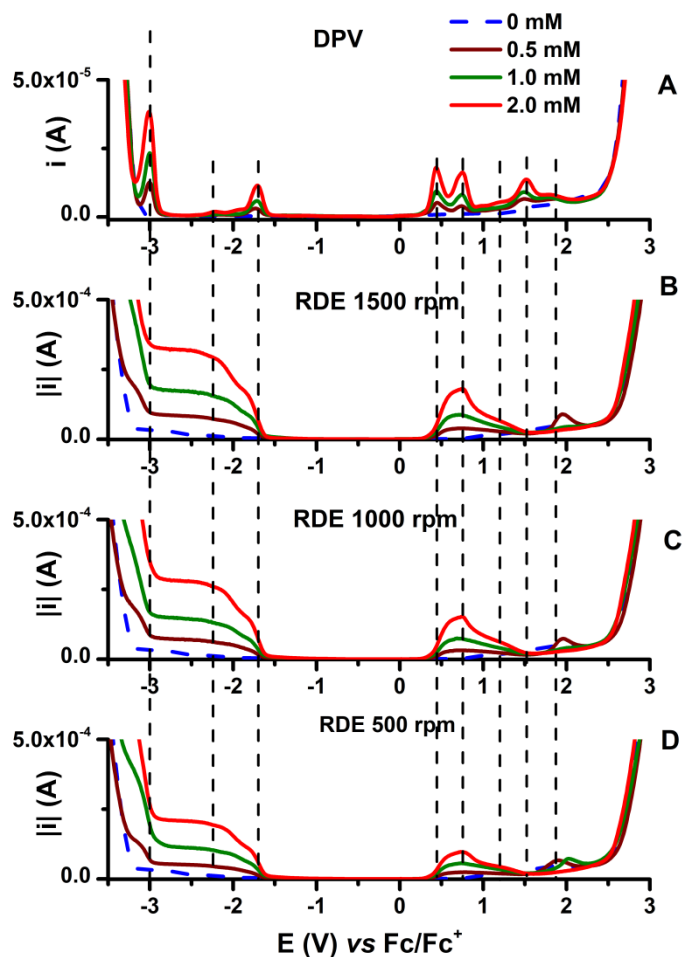

**Figure S4.** DPV (0.01 V/s) (A), RDE at 1500 rpm (B), RDE at 1000 rpm (C), and RDE 500 rpm (D) curves (with currents in absolute values) on GC for **R2** in 0.1 M TBAP/ CH<sub>3</sub>CN at different concentrations (mM): 0 (dashed blue line), 0.5 (wine line), 1 (olive line), 2 (red line).

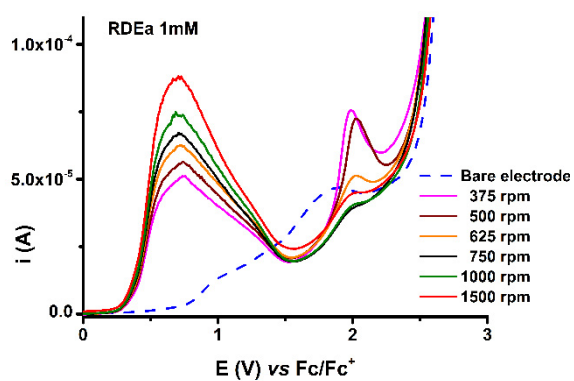

**Figure S5.** Anodic RDE curves on GC at different rotation rates (rpm) for **[R2]** = 1 mM in 0.1M TBAP/ CH<sub>3</sub>CN.

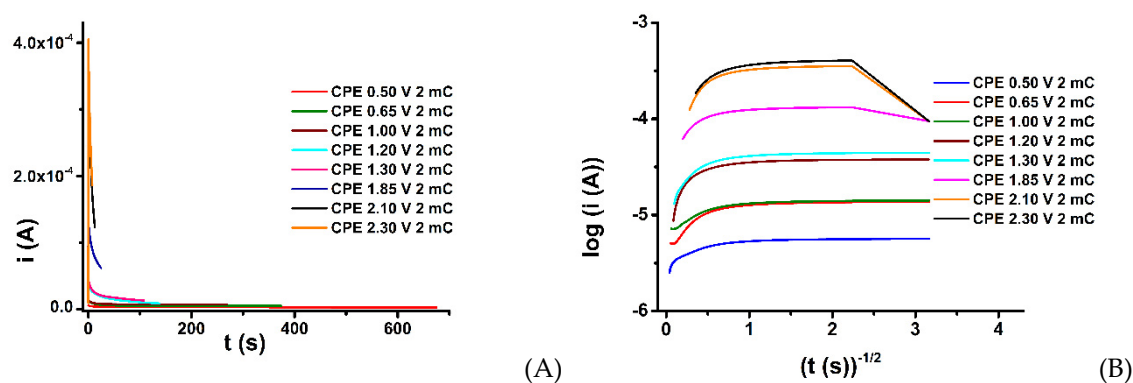

**Figure S6.** Chronoamperograms in coordinates  $i$ - $t$  (A) and  $\log(i)$ - $t^{-1/2}$  (B) during the preparation of R2-CMEs by CPE at different potentials using charges of 2 mC.

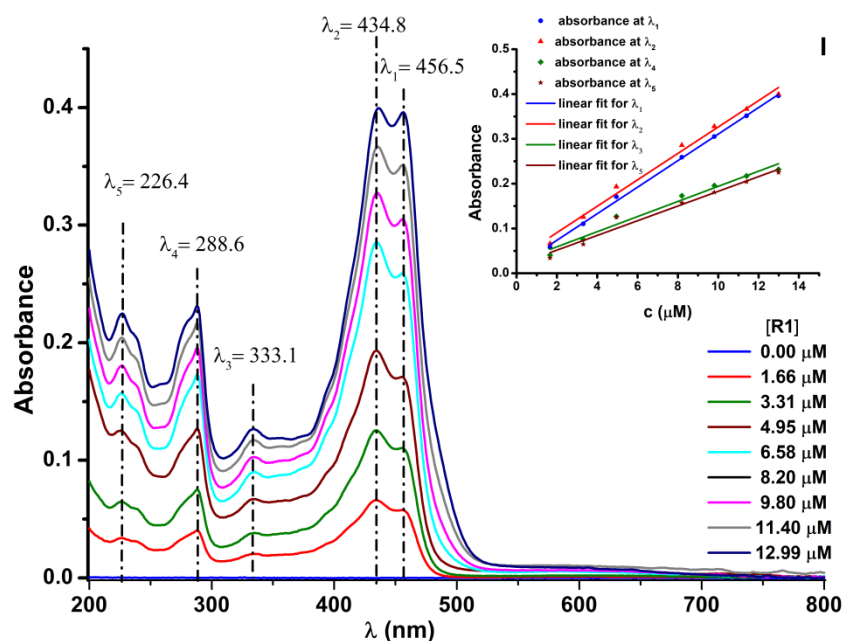

**Figure S7.** UV-Vis spectra obtained for different concentrations of R1 and inset: dependence of absorbances on R1 concentration ( $c$ ).

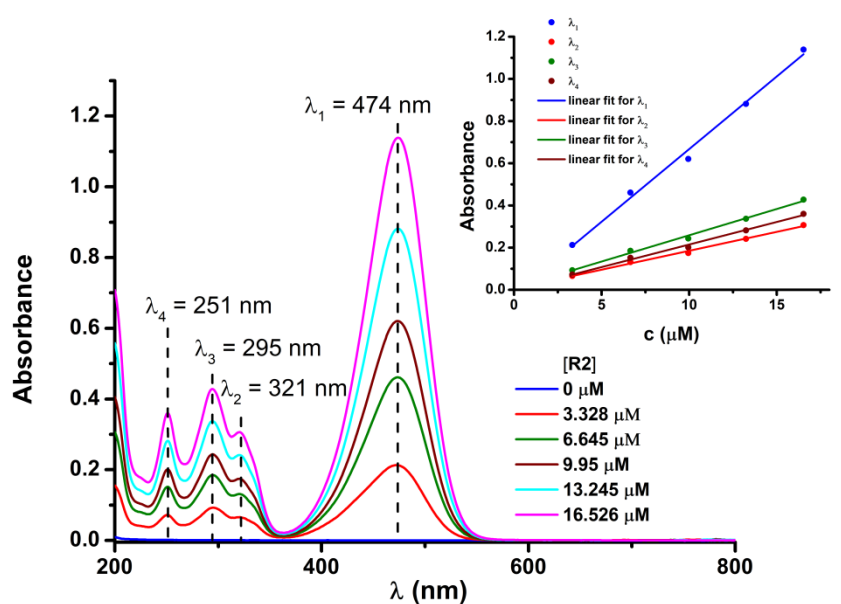

**Figure S8.** UV-Vis spectra obtained for different concentrations of R2 and inset: dependence of absorbances on R2 concentration ( $c$ ).
